# Supplementary material for: A promising mixed micellar approach to tune the oxidation of isoprenol by diperiodatoargentate(iii) in aqueous media
Source: Royal Society of Chemistry journal article supplement (doi:10.1039/d2nj05120f), 2023-01-01
Supplement: d2nj05120f1.pdf [file d2nj05120f1.pdf]

## A promising mixed micellar approach to tune the oxidation of isoprenol by diperiodatoargentate(III) in aqueous media

Sandip Kundu<sup>a</sup>, Priya Karmakar<sup>a</sup>, Sk Meheubub Rahaman<sup>a</sup>, Mandira Mitra<sup>a</sup>, Sangita Rajwar<sup>b</sup>, Subhendu Dhibar<sup>a</sup>, Mousumi Layek<sup>a</sup>, Pintu Sar<sup>\*,a</sup>, Bidyut Saha<sup>\*,a</sup>

<sup>a</sup>Surfactant Chemistry Laboratory, Department of Chemistry, The University of Burdwan, Burdwan-713104, West Bengal, India

<sup>b</sup>Department of Chemical Sciences, Indian Institute of Science Education and Research, Kolkata-741246, West Bengal, India

\*Corresponding authors

Email addresses: [pintusar1@gmail.com](mailto:pintusar1@gmail.com) (PS), [b\\_saha31@redifmail.com](mailto:b_saha31@redifmail.com) (BS), [bsaha@chem.buruniv.ac.in](mailto:bsaha@chem.buruniv.ac.in) (BS)

### Supplementary data

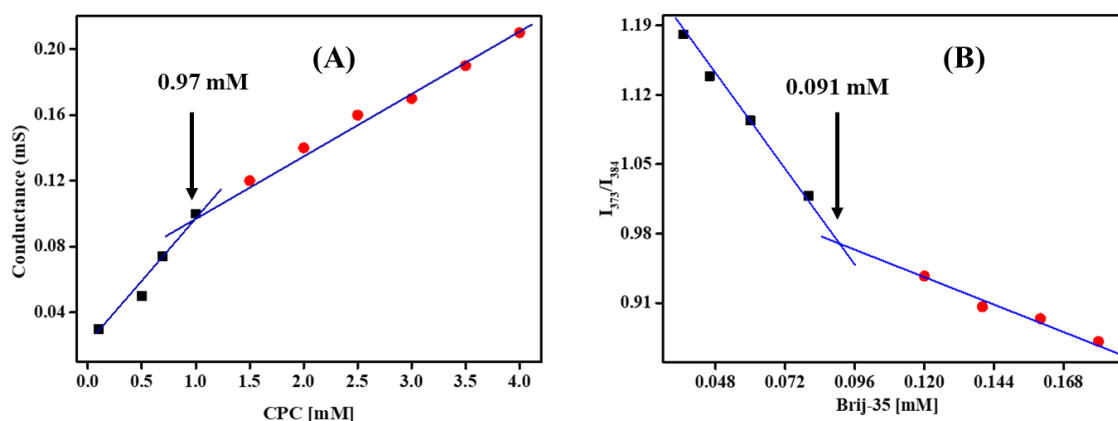

Figure 1S. CMC determination of CPC (A) and Brij-35 (B) surfactants following conductometric and fluorimetric methods, respectively.

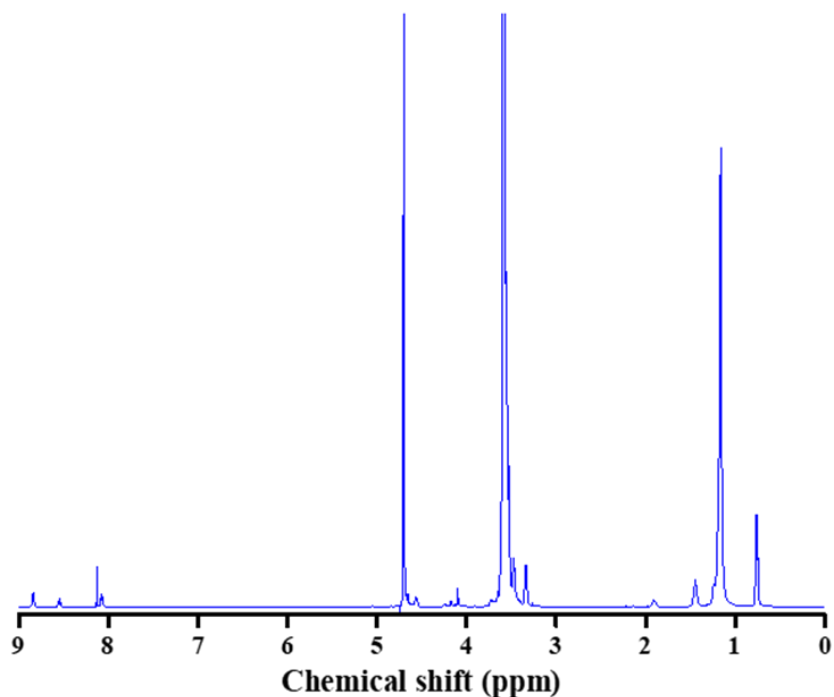

Figure 2S.  $^1\text{H}$  NMR spectra of binary surfactant mixture of CPC and Brij-35 in  $\text{D}_2\text{O}$  at post micellar concentration.

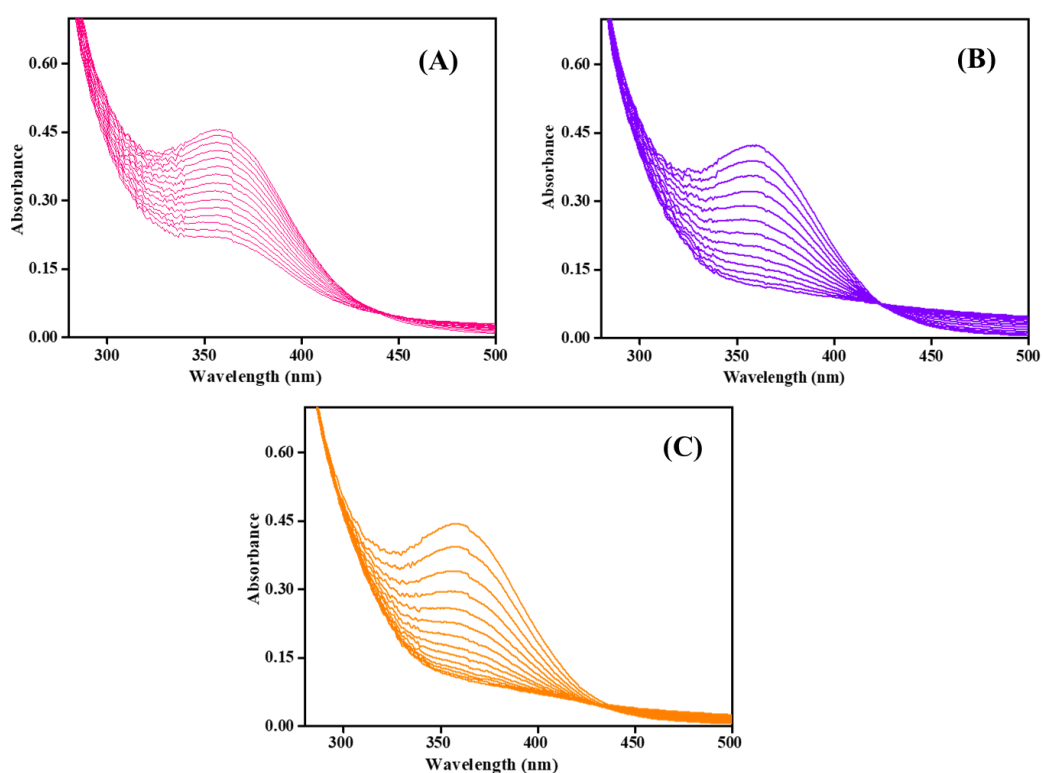

Figure 3S. UV-vis scanned absorption spectra of isoprenol oxidation by DPA in presence of CPC surfactant at 6 min interval;  $[\text{isoprenol}] = 2.72 \times 10^{-4} \text{ mol dm}^{-3}$ ,  $[\text{DPA}] = 2.72 \times 10^{-5} \text{ mol dm}^{-3}$  (A) 1 mM CPC (B) 3 mM CPC (C) 5 mM CPC.

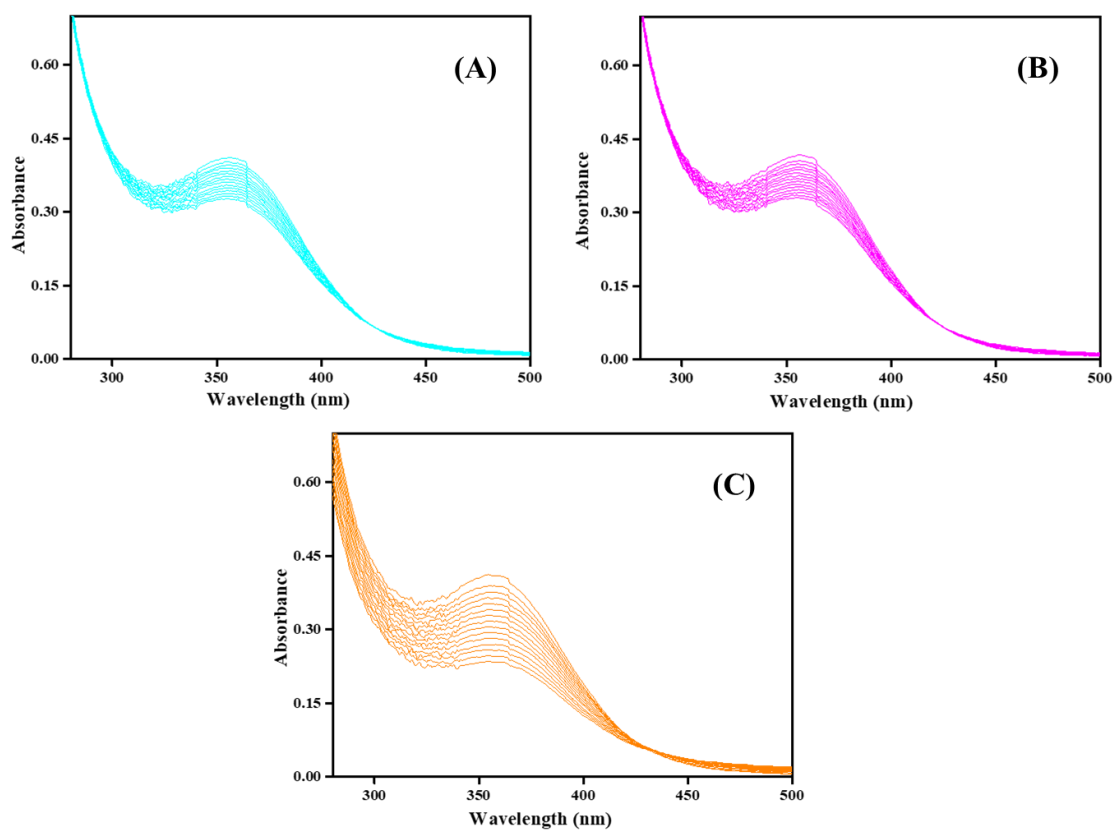

Figure 4S. UV-vis scanned absorption spectra of isoprenol oxidation by DPA in presence of Brij-35 surfactant at 6 min interval; [isoprenol] =  $2.72 \times 10^{-4} \text{ mol dm}^{-3}$ , [DPA] =  $2.72 \times 10^{-5} \text{ mol dm}^{-3}$  (A) 0.8 mM Brij-35 (B) 1 mM Brij-35 (C) 3 mM Brij-35.

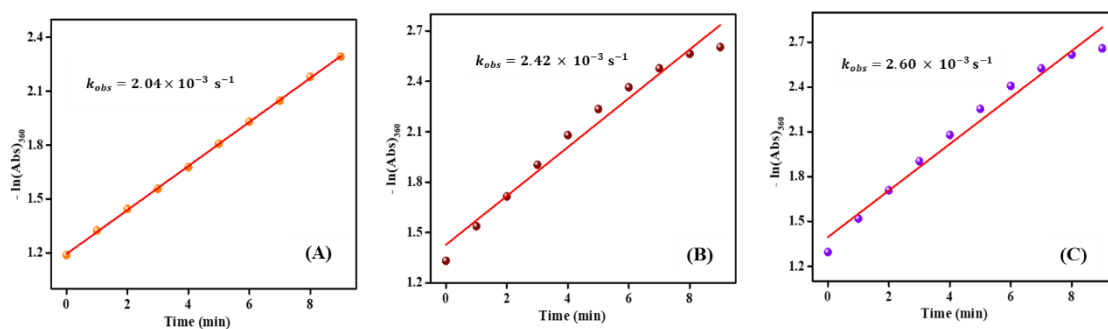

Figure 5S. Determination of rate constant values ( $k_{obs}$ ) for the studied reactions in mixed micellar media at varying composition of surfactants (CPC: Brij-35), (A) 3:1 (B) 1:3 (C) 1:1

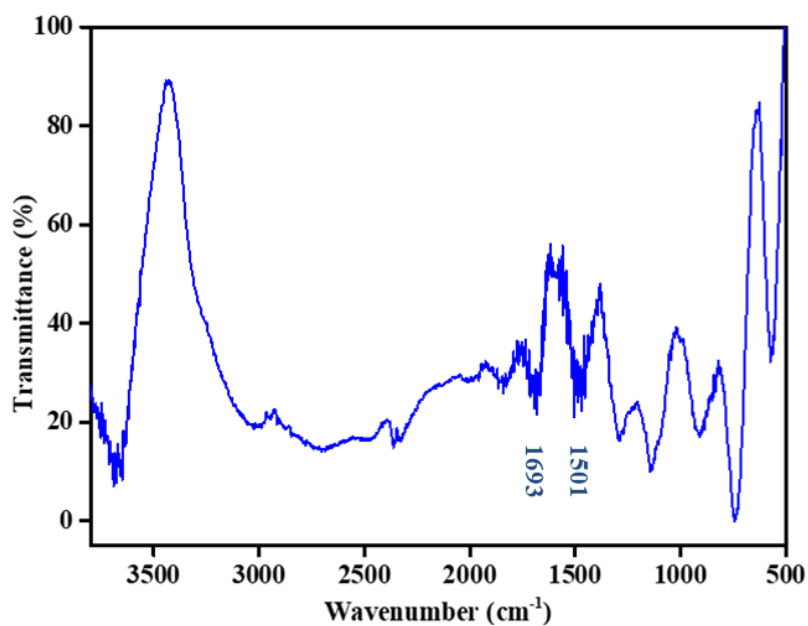

Figure 6S. FT-IR spectrum of isolated oxidized product of the studied oxidation reaction.

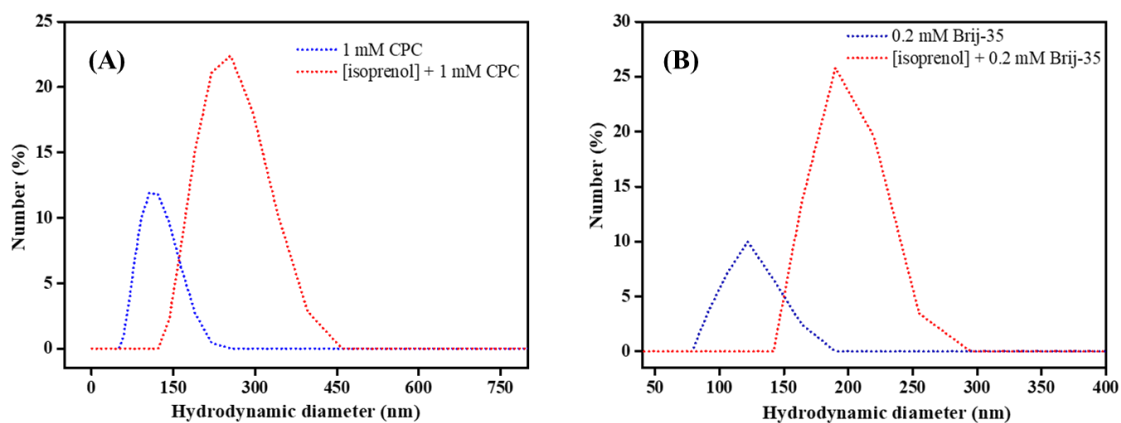

Figure 7S. Hydrodynamic diameter of aqueous surfactant solution alone and in presence of isoprenol at the post-micellar concentration of surfactants: (A) CPC (B) Brij-35

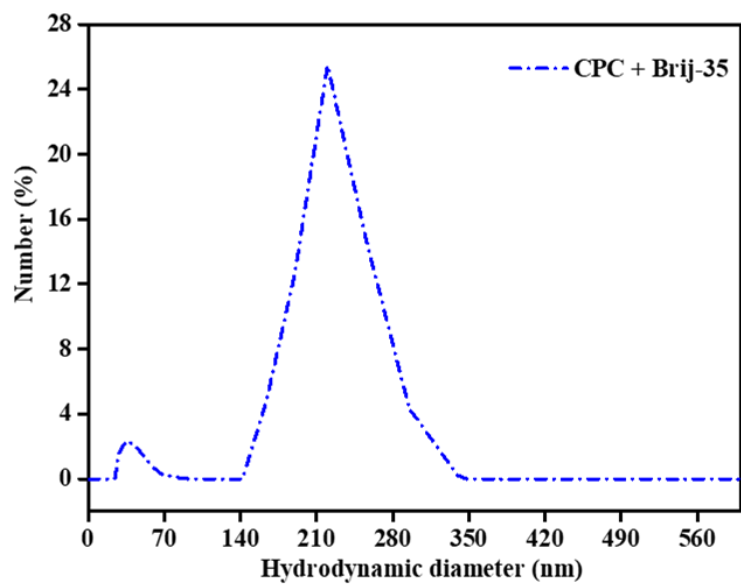

Figure 8S. Hydrodynamic diameter of mixed surfactant system (CPC and Brij-35) above their CMC ( $> 0.241$  mM).

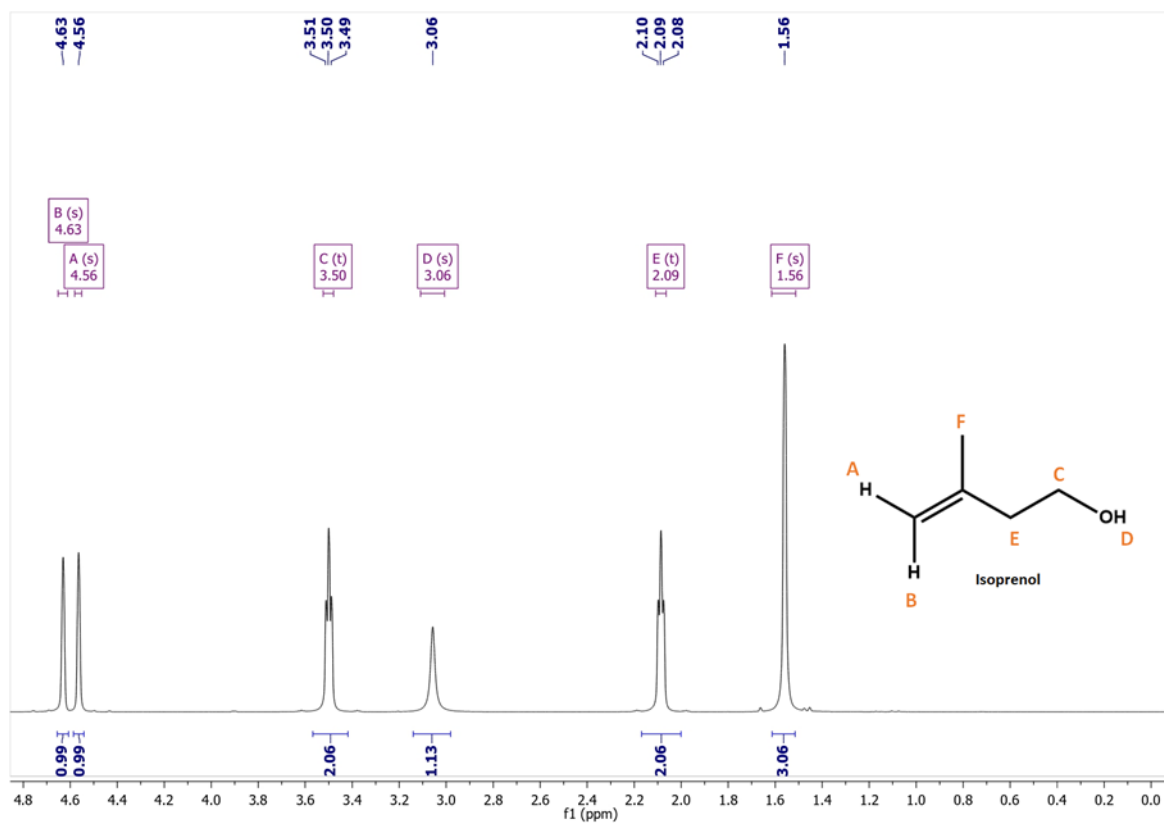

Figure 9S.  $^1\text{H}$  NMR spectrum of isoprenol in  $\text{CDCl}_3$  medium.
